# Supplementary material
Source: Springer Nature journal article supplement (https://www.springermedizin.de/resource/supplementary/13034_2012_224_MOESM1_ESM.pdf/9652574)

# Appearance-Related Social Pressure

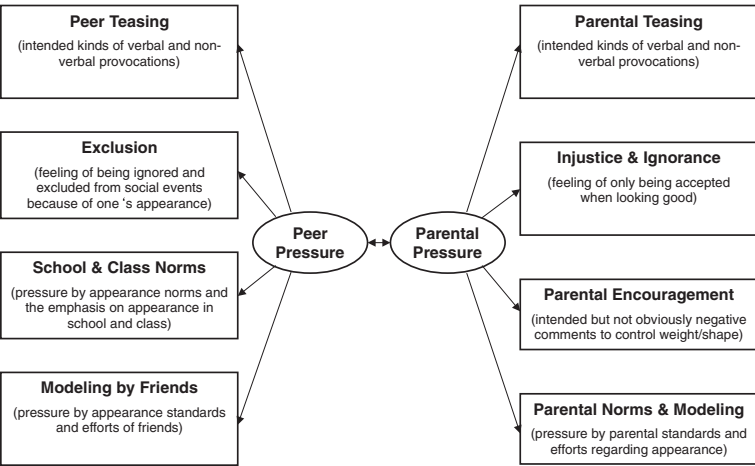

Supplement: MOESM1 [file 9652574]
